# Supplementary material
Source: publisher site journal article supplement (https://www.dovepress.com/article/542722)
Supplement: Supplementary file 1 [file 0902-Supplement.docx]

**Supplement**

**Table S1. Primers for amplification and SNaPshot® analysis**

| Gene | SNP | Primer sequence (5’-3’) |
| --- | --- | --- |
| CYP2C9*2 | rs1799853 | F: CAGGAAGAGATTGAACGTGTGAT |
| R: GGAGAAACAAACTTACCTTGGGA |
| SNaPshot: GTGCACGAGGTCCAGAGATAC |
| CYP2C9*2 | rs1799853 | F: GTCAGCTTCCTCTTTCTTGCC |
| R: CACCCCTGAAATGTTTCCAA |
| SNaPshot: GGGAAGAGGAGCATTGAGGAC |
| CYP2C9*8 | rs1057910 | F: GTCAGCTTCCTCTTTCTTGCC |
| R: CACCCCTGAAATGTTTCCAA |
| SNaPshot: CTCAACTCCTCCACAAGGCAG |
| CYP2C9*29 | rs182132442 | F: GAATTCACTGTAATCAAATATGCTGG |
| R: CATATCTCAGGGTTGTGCTTGTC |
| SNaPshot: TCCTAGGAAAAGCACAACCAA |
| ABCB1 | rs1045642 | F: ATCGTGTCCCAGGAGCCCAT |
| R: GCTCCCAGGCTGTTTATTTGA |
| SNaPshot: CCTCCTTTGCTGCCCTCAC |
| PXR | rs1523127 | F: TGCTTGGTGGTAAGTTCTTTGC |
| R: GCCTTTACTTCAGTGGGAATCTC |
| SNaPshot: GAATAAGCTAATACTCCTGTCCTGAA |
| PXR | rs3814055 | F: AGGGCTGGATTAAAGCATGTACT |
| R: CAAGCCTCTGGCAACAGTAAAG |
| SNaPshot: TTTTTGGCAATCCCAGGTT |
| POR | rs1135612 | F: AGGGCTGGATTAAAGCATGTACT |
| R: CAAGCCTCTGGCAACAGTAAAG |
| SNaPshot: TTTTTGGCAATCCCAGGTT |
| POR | rs1135612 | F: CGGTGGTTGTGGAGTACGAG |
| R: GATGAAGCCTATGAAGGGTGC |
| SNaPshot: CCGCCGTTCTCCCCG |
| POR | rs1057868 | F: ACATGGTCTCGCTCTGTTGC |
| R: GGTGTTGTTCCATAAGGGTGAG |
| SNaPshot: AGCCTTGCAAAGTTCTGAGATC |
| UGT1A9 | rs28898617 | F: TGAAGAAAGCAAATGTAGCAGG |
| R: ACCAACACCTTTCCACTCTCAG |
| SNaPshot: AGCCACGGCAGGGGAACC |
| ABCB1 | rs4148738 | F: GAAAGACCAGGGAAGAGGAAAT |
| R: ATGGGGACTAAGAAGAATGGAAG |
| SNaPshot: GCTGACCTGTTTTTGGCTGAC |

**Note:** * represents a specific allele or genetic variant of that gene.

**Abbreviations:** SNP, single nucleotide polymorphism; F, forward; R, reverse;


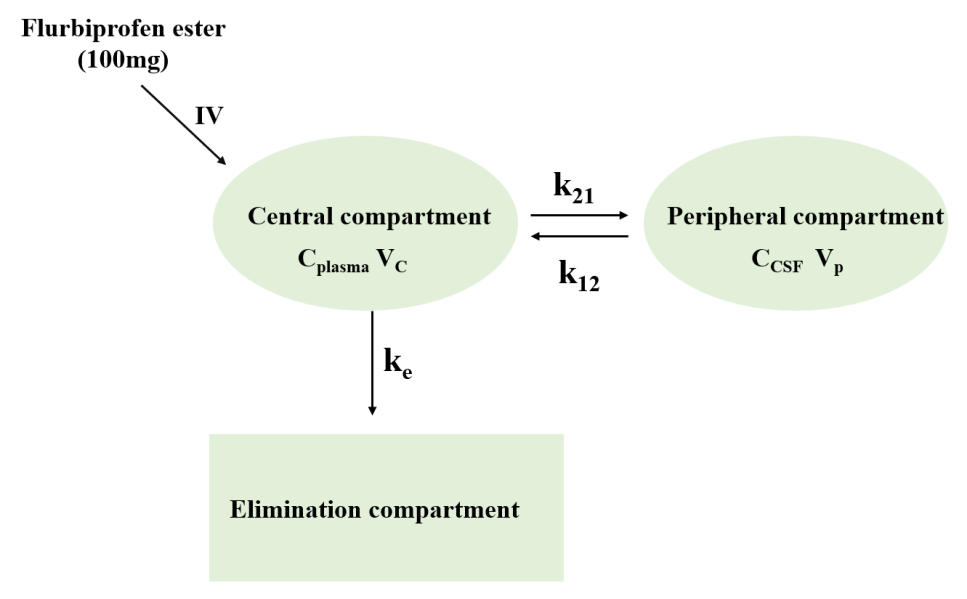


**Figure S1. Schematic diagram of the two-compartment model of flurbiprofen.**

k12: distribution rate from central to peripheral; k21: distribution rate from peripheral to central; ke: Elimination rate (metabolism/excretion). IV, Intravenous Injection. Cplasma, concentration in the plasma; Vc, apparent volume of distribution in the plasma; CCSF, concentration in the cerebrospinal fluid; VCSF, apparent volume of distribution in the cerebrospinal fluid.
